# Supplementary material for: Safety evaluations of a synthetic antimicrobial peptide administered intravenously in rats and dogs
Source: PubMed Central journal article supplement (PMC9652379; doi:10.1038/s41598-022-23841-2), 2022-11-11
Supplement: 41598_2022_23841_MOESM1_ESM.pdf [file 41598_2022_23841_MOESM1_ESM.pdf]

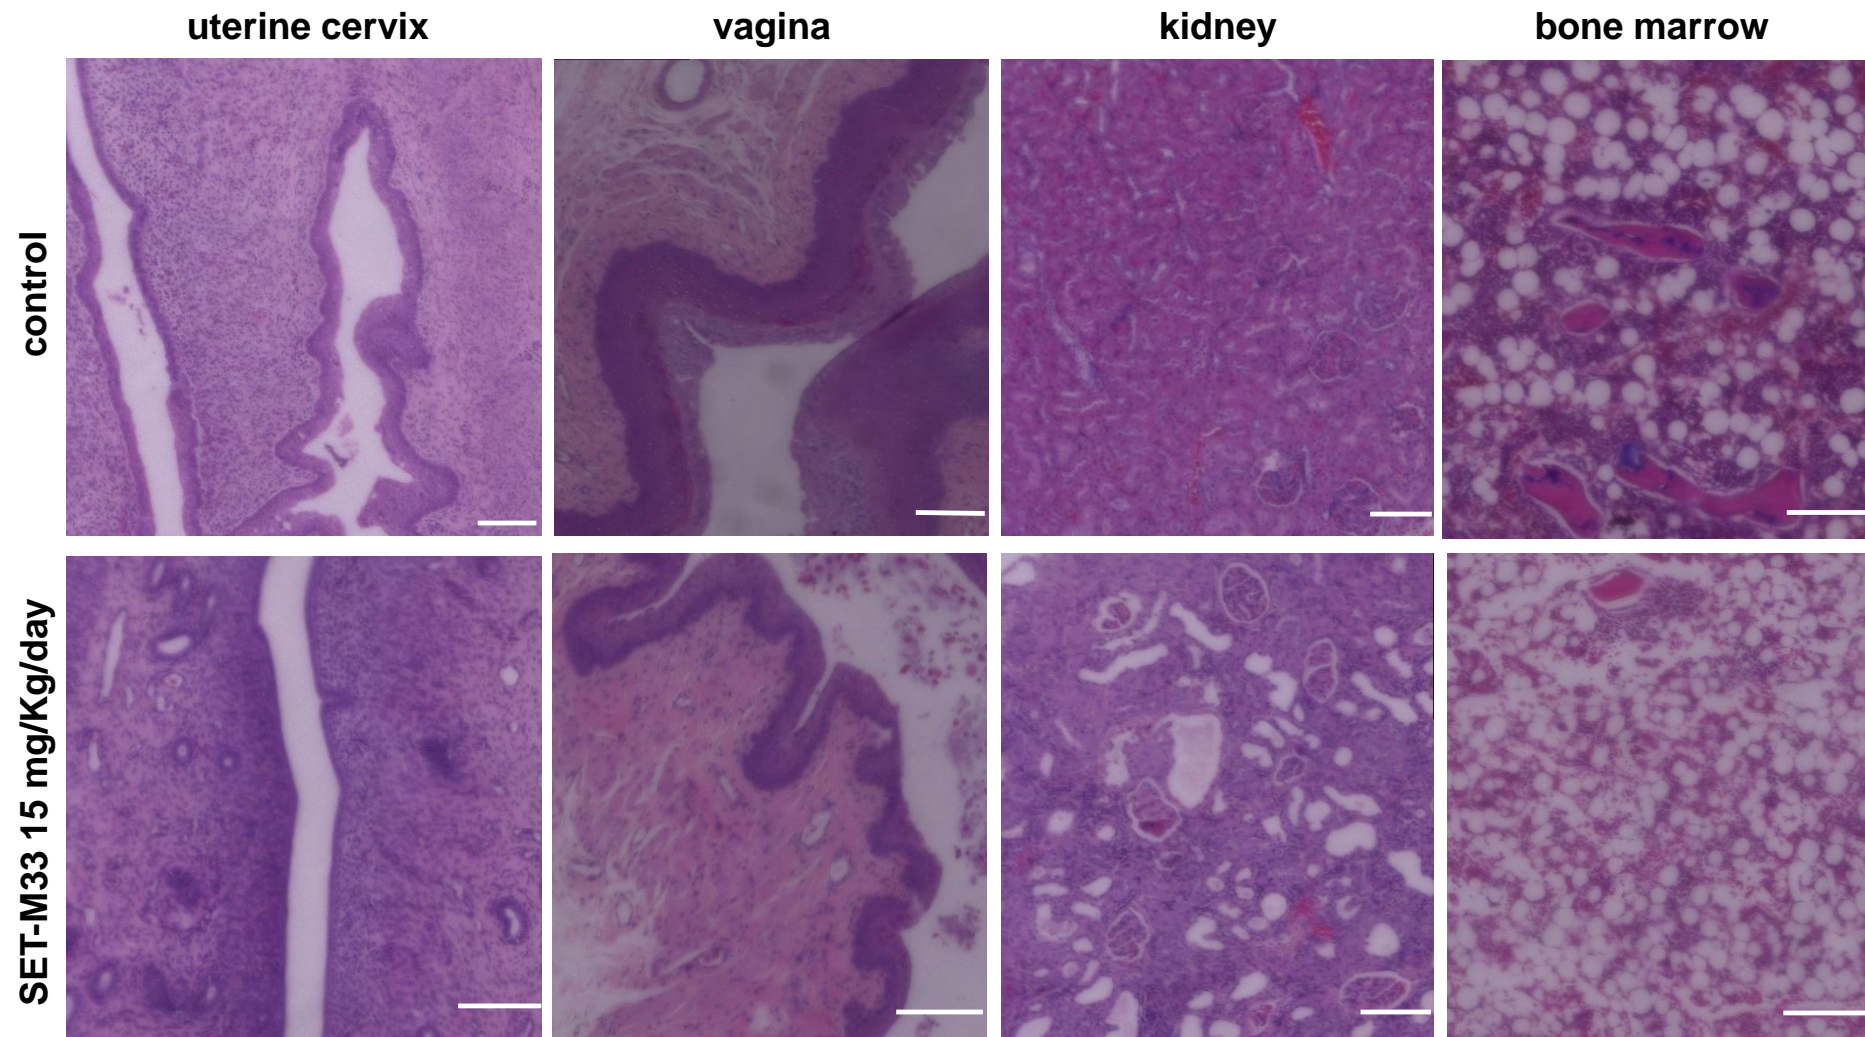

Histological sections of tissues collected after 2-week recovery period of **rats** treated with vehicle (panels above) and SET-M33 at 15 mg/Kg/day for 28 days (panels below). In the animals treated with SET-M33 the following findings resulted evident: atrophy of the epithelial surface in uterine cervix and vagina; parenchymal degenerations in the kidney; increase of adipocytes in the femur bone marrow. Scale bars (white lines) correspond to 100  $\mu$ m.

Samples were examined by confocal laser microscope (Leica TCS SP8). All images were processed using ImageJ software (NIH)
